# Supplementary material for: Near-infrared signature of hydrothermal opal: a case study of Icelandic silica sinters
Source: Copernicus journal article supplement (doi:10.5194/ejm-35-949-2023), 2023-11-13
Supplement: Supplementary file 1 [file ejm-35-949-2023-supplement.pdf]

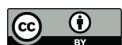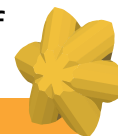

*Supplement of*

## **Near-infrared signature of hydrothermal opal: a case study of Icelandic silica sinters**

**Maxime Pineau et al.**

*Correspondence to:* Maxime Pineau ([maxime.pineau@lam.fr](mailto:maxime.pineau@lam.fr))

The copyright of individual parts of the supplement might differ from the article licence.

# Near-infrared signature of hydrothermal opal: a case study of Icelandic silica sinters

## Spectral criteria calculation procedures

### **BDR<sub>5235/5100</sub>**

#### **Band depth ratio of the 5235 and 5100 cm<sup>-1</sup> absorptions (BD<sub>5235</sub>/BD<sub>5100</sub>)**

This spectral criterion is similar to the BDR<sub>1.91/1.96</sub> of Rice et al. (2013) that quantifies the shape of the 5200 cm<sup>-1</sup> absorption band (1.90 μm). To calculate this criterion, we first calculate the band depth of both components at 5235 and 5100 cm<sup>-1</sup>, BD<sub>5235</sub> and BD<sub>5100</sub>. For both, we used the same method. For an absorption band centered at a wavelength λ<sub>C</sub> with a minimum of reflectance R<sub>C</sub>, R<sub>C</sub><sup>\*</sup> can be considered as the virtual reflectance at λ<sub>C</sub> interpolated onto a linear continuum between two anchor points: S (λ<sub>S</sub>, R<sub>S</sub>) and S (λ<sub>L</sub>, R<sub>L</sub>). R<sub>C</sub><sup>\*</sup> is then expressed:

$$R_C^* = a \cdot R_S + b \cdot R_L$$

$$\text{with } a = 1 - b; \text{ and } b = \frac{\lambda_C - \lambda_S}{\lambda_L - \lambda_S}$$

The band depth of the absorption at λ<sub>C</sub> (BD<sub>C</sub>) is then expressed as:

$$BD_C = 1 - \frac{R_C}{R_C^*}$$

with R<sub>C</sub>, the measured reflectance;  
and R<sub>C</sub><sup>\*</sup>, the virtual reflectance.

For BD<sub>5235</sub>: λ<sub>C</sub> = 5235 cm<sup>-1</sup> ; λ<sub>S</sub> = 5495 cm<sup>-1</sup> ; λ<sub>L</sub> = 4705 cm<sup>-1</sup> ; a = 0.671 ; b = 0.329

For BD<sub>5100</sub>: λ<sub>C</sub> = 5100 cm<sup>-1</sup> ; λ<sub>S</sub> = 5495 cm<sup>-1</sup> ; λ<sub>L</sub> = 4705 cm<sup>-1</sup> ; a = 0.500 ; b = 0.500

### **BDR<sub>4525/4425</sub>**

#### **Band depth ratio of the 4525 and 4425 cm<sup>-1</sup> absorptions (BD<sub>4500</sub>/BD<sub>4425</sub>)**

This spectral criterion is similar to the BDR<sub>2.26/2.21</sub> of Sun & Milliken (2018) that quantifies the shape of the 4500 cm<sup>-1</sup> absorption band (2.20 μm). To calculate this criterion, we calculate the band depth of both components at 4525 and 4425 cm<sup>-1</sup>, BD<sub>4525</sub> and BD<sub>4425</sub>. The method for the calculation of each band depth is the same as explained above.

For BD<sub>4525</sub>:  $\lambda_C = 4525 \text{ cm}^{-1}$  ;  $\lambda_S = 4705 \text{ cm}^{-1}$  ;  $\lambda_L = 4255 \text{ cm}^{-1}$  ;  $a = 0.600$  ;  $b = 0.400$

For BD<sub>4425</sub>:  $\lambda_C = 4425 \text{ cm}^{-1}$  ;  $\lambda_S = 4705 \text{ cm}^{-1}$  ;  $\lambda_L = 4255 \text{ cm}^{-1}$  ;  $a = 0.378$  ;  $b = 0.622$

### **CRC<sub>5200</sub> and CRC<sub>7000</sub>**

#### **Concavity-Ratio-Criterion (CRC) of the 5200 and 7000 cm<sup>-1</sup> absorptions**

These two criteria were first defined by Chauviré et al. (2017) on transmission measurements. They quantify the shape of the high-frequency side of the 5200 and 7000 cm<sup>-1</sup> absorptions respectively. Pineau et al. (2020) then adapted the calculation procedure for reflectance measurements.

For the absorption band at 5200 cm<sup>-1</sup>, we chose two anchor points at  $\lambda_S \approx 4700 \text{ cm}^{-1}$  and  $\lambda_L \approx 5400 \text{ cm}^{-1}$ . Then, two band depth are calculated: BD<sub>C</sub> is the real band depth of the low-frequency inflection point at 5100 cm<sup>-1</sup>, and BD<sub>C</sub><sup>\*</sup> is the virtual band depth of the same inflection point using a linear continuum between the minimum of reflectance and the low-frequency anchor point at  $\lambda_L$  (the calculation method of band depths is explained above). The CRC<sub>C</sub> is calculated as:

$$CRC_C = \frac{BD_C}{BD_C^*}$$

The same calculation is applied for the absorption band at 7000 cm<sup>-1</sup>, using anchors at  $\lambda_S \approx 6000 \text{ cm}^{-1}$ ,  $\lambda_L \approx 7700 \text{ cm}^{-1}$ , and BD<sub>C</sub> = 6850 cm<sup>-1</sup>.

The error in the CRC calculation is calculated empirically by shifting the two anchor points at  $\lambda_S$  and  $\lambda_L$  over 50 cm<sup>-1</sup> (25 spectels), which generates 2809 distinct combinations for a single measurement. The CRC is calculated for each of the 2809 combinations. The retained value for the CRC is the average of all calculated values, and the error represents the standard deviation (1σ)

## REFERENCES

Chauviré, B., Rondeau, B., and Mangold, N.: Near infrared signature of opal and chalcedony as a proxy for their structure and formation conditions, *Europ. J. Mineral.*, 29, 409–421, <https://doi.org/10.1127/ejm/2017/0029-2614>, 2017.

Pineau, M., Le Deit, L., Chauviré, B., Carter, J., Rondeau, B., and Mangold, N.: Toward the geological significance of hydrated silica detected by near infrared spectroscopy on Mars 45 based on terrestrial reference samples, *Icarus*, 347, 113706, <https://doi.org/10.1016/j.icarus.2020.113706>, 2020.

Rice, M. S., Cloutis, E. A., Bell, J. F., Bish, D. L., Horgan, B. H., Mertzman, S. A., Craig, M. A., Renaut, R. W., Gautason, B., and Mountain, B.: Reflectance spectra diversity of silica-rich materials: Sensitivity to environment and implications for detections on Mars, *Icarus*, 223, 499–533, <https://doi.org/10.1016/j.icarus.2012.09.021>, 2013.

Sun, V. Z. and Milliken, R. E.: Distinct Geologic Settings of Opal-A and More Crystalline Hydrated Silica on Mars, *Geophys. Res. Lett.*, 45, 10221–10228, <https://doi.org/10.1029/2018GL078494>, 2018.
